# Supplementary material for: Insights into the evolution and diversification of the AT-hook Motif Nuclear Localized gene family in land plants
Source: PubMed Central journal article supplement (PMC4209074; doi:10.1186/s12870-014-0266-7), 2014-10-14

(a)

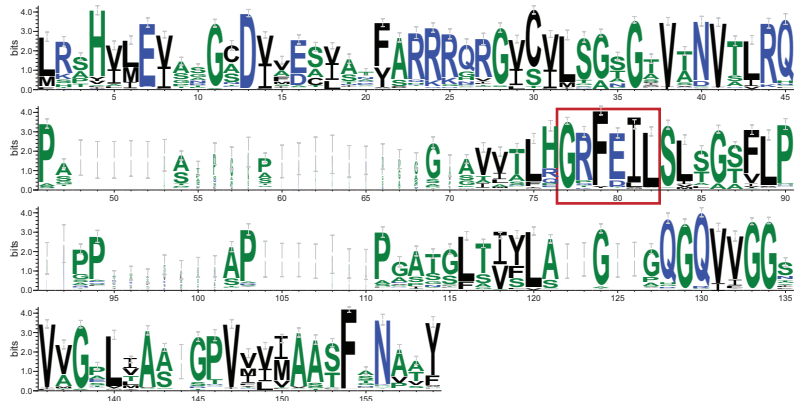

(b)

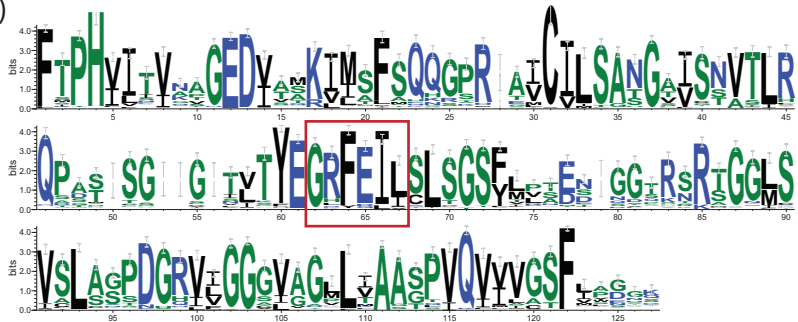

Supplement: 12870_2014_266_MOESM4_ESM.pdf [file 12870_2014_266_MOESM4_ESM.pdf]
