# Supplementary material for: Insights into the evolution and diversification of the AT-hook Motif Nuclear Localized gene family in land plants
Source: PubMed Central journal article supplement (PMC4209074; doi:10.1186/s12870-014-0266-7), 2014-10-14
Supplement: 12870_2014_266_MOESM5_ESM.pdf [file 12870_2014_266_MOESM5_ESM.pdf]

### >TaAHL1/Taq1

atggggagcatggacggcaccgctccagggcaaccacgcctacgccacgtccctgccggcagcaacaacgacgag  
gacgacgcgtcgccgcccctcgccggcggggctcctcggggtcgggcccgcgcccggcggcaggccccggg  
tccaagaacaagcccagccgcccgtggtggtgacgcgaggagagcccaacgcgatgcgctcccacgtgctggagatcg  
ccagcggggccgacatcgtggaggccatcgcgcccttcccggccgaggcagcggcgctcctcctcagcgggagc  
ggcgcctcaccaacgtcacgctgcgccagcccgcggggaccggggcggcccgctgcacctaaaggggcgcttcgag  
atactctccctgtccggcgcttctcccggcgccggcgcccggggcgacggggctgccgtctacctcgccggcgggc  
aggggcaggtggtcggggcagcgtgatggggagcttctcgcgtccggccccgcatggtgatcgggccacgttcggca  
acggccacgtacgagaggctgccgtggatcaagacgccgaggagggcgccgtgctgtccgggtcggagggcgccgcca  
cgcagctggagcagcagggcagcggaggcgccgcccgtgccccaccgatgtacgccgtgccgcagacgcccccggc  
gacatgttcgggcagtggggacaggcagccgtggcgcgccctccgcccagctcattctag

### >TaAHL3/Taq3

atggccaccggcagcagcaagtggtggcaagggccaatggacttcccggccgacccgagccgagccgagcagatgcagcag  
catcagccgctccagcaccagcaccagccgctgcagctgccggcggtgaccatgccggcgccggtccagcgggtggccg  
cctcgccggagagcaagcagcagcagcagcagggccagggccagggcgagggggcagatggggggcggcggcggggg  
ccatcgtgcagctgcggaggccggggggccggccgatgggtccaagaacaagcccagccgataatcatcacgcg  
cgacagccccgacgcgctccactcgcacatcctggaggtggccccggggcgcgagcgtcgcgcccctgcgtcgccgagtacg  
cgcgcccgcgcccggggcgctcgtgctggggcgcgtccggctccgctcgtggacgtcgtcgtgcgcccgcggcctcgg  
ccgcgcccctcccggggcgcttcgagctcctcctcatgaccggcaccgtgctcccgccccggcgccgctccgaggcgtccgg  
cctcgcagtcatgcttccgcccgggagggccaggtcctcggtggtcgtcgtggtggccgctcgtcgcgcccgggcccgtc  
acctcttcgcccaccttcgccaacgccgtctacgagcgcctgccccctcaggacgccgcccagccgacgtcaagccc  
gacctctccgcccggcggcctcggctcccgcaagaagtgaagcgcagcagccactggcgatctcccaggccatggc  
catggggcgcgggctaccccgaccaccgctcaccgcagtaaccgctggggaggccaccagggaggcggcatctga

### >Gm06g01650.1\_Partial

ccccagtcgacgacgacgagcggagaaggacccttctccaccagcggcgcctcgcggggcgcccatgggctc  
caagaacaagcccagccacccgcatagtcacgcgcgacagcccaacgtcctccgctcgcacgttcttgaggtc  
tctcggcgccgacgtggtggagagccttccaactatgcgcgcccggaggaggagggttcctgctcagtg  
gctccggcacggtggccaacgtcgtcctcgtcaaccggccgggagcgtcctcacgctccacggccggttgagat  
agttccatgacggggacggtgctcccgcctccggcgccaccgggttcggacgggtgtcggttatctgtcaggggc  
gcagggacaggtggtggggcggtggtggcccctcgtggttcgagtcacgtggtttggtggctgcttcttcg  
ctaaccgatgttcgaaaggttacccttgccctgaaatcagcatgatgatgatcaaggtgaagtatttgatgggg  
tggaaactggaactacatcatcaacatcaactgcaccacccaaaactcatccttcta
