# Supplementary material for: Insights into the evolution and diversification of the AT-hook Motif Nuclear Localized gene family in land plants
Source: PubMed Central journal article supplement (PMC4209074; doi:10.1186/s12870-014-0266-7), 2014-10-14
Supplement: 12870_2014_266_MOESM6_ESM.pdf [file 12870_2014_266_MOESM6_ESM.pdf]

**AtAHL29** MDGGYDQSGGASRYFHNLFRPELHHQ-LQPQPQLHPLPQ---PQPQPQPQQQNSDDESNSNKD-----PGSDPVTS  
**AtAHL27** MEGGYEQGGGASRYFHNLFRPEIHHQQLQPQGGINLIDQH HHQHQQHQQQQQPSDDSRESDHSNKDH HQGRPDSDPNTS  
**Gm06g01650.1\_Partial** -----PQSDDDDGEGPFS-----

**AtAHL29** GST-GKRPRGRPPGSKNPKPPVIVTRDSPNVL RSHVLEVSSGADIVESVTTYARRRGRGVSILSGNGTVANVSLRQPAT  
**AtAHL27** SSAPGKRPRGRPPGSKNKA KPPPIVTRDSPNAL RSHVLEVSPGADIVESVSTYARRRGRGVSVLGGNGTVSNVTLRQPVT  
**Gm06g01650.1\_Partial** ----QRRPRGRPMGSKNPKPPVIVTRDSPNVL RSHVLEVSSGADVVESLSNYARRRGRGVSVLSGSGTVANVVLRQPA-  


**AtAHL29** TAAHGANGGTGGVVALHGRFEILSLTGTVLPPPAPPGSGGLSIFLSGVQGQVIGGNVVAPLVASGPVILMAASF SNATFE  
**AtAHL27** PGNGGGVSGGGGVVTLHGRFEILSLTGTVLPPPAPPGAGGLSIFLAGGQGVVGGSVVAPLIASAPVILMAASF SNAVFE  
**Gm06g01650.1\_Partial** -----GSVLT LHGRFEIVSMTGTVLPPPAPPGSDGLSVYLSGAQGQVVGGVVVAPLVASSHVVLVAASFANAMFE  


**AtAHL29** RLPLEDEGGEGGEGGEVGE GGGGEGGPPPATSSSPPSG-AGQGQLRGNMSGYDQFAGDPHLLGWGAAAAAAPPRPAF  
**AtAHL27** RLPIEEEEEGGGG--GGGGGPPQMQA PSASPPSGVTGQGQLGGNVGGYG-FSGDPHLLGWGAGTPSRPPF---  
**Gm06g01650.1\_Partial** RLPLPLNQHDDDDQG--EVFGWGGTGTTSSTSTAPPKT-----HPF---
