# Supplementary material for: Insights into the evolution and diversification of the AT-hook Motif Nuclear Localized gene family in land plants
Source: PubMed Central journal article supplement (PMC4209074; doi:10.1186/s12870-014-0266-7), 2014-10-14
Supplement: 12870_2014_266_MOESM9_ESM.pdf [file 12870_2014_266_MOESM9_ESM.pdf]

(a)

*Arabidopsis thaliana* AHLs

1st Intron

2nd Intron

3rd Intron

4th Intron

1st Exon

2nd Exon

3rd Exon

4th Exon

5th Exon

(b)

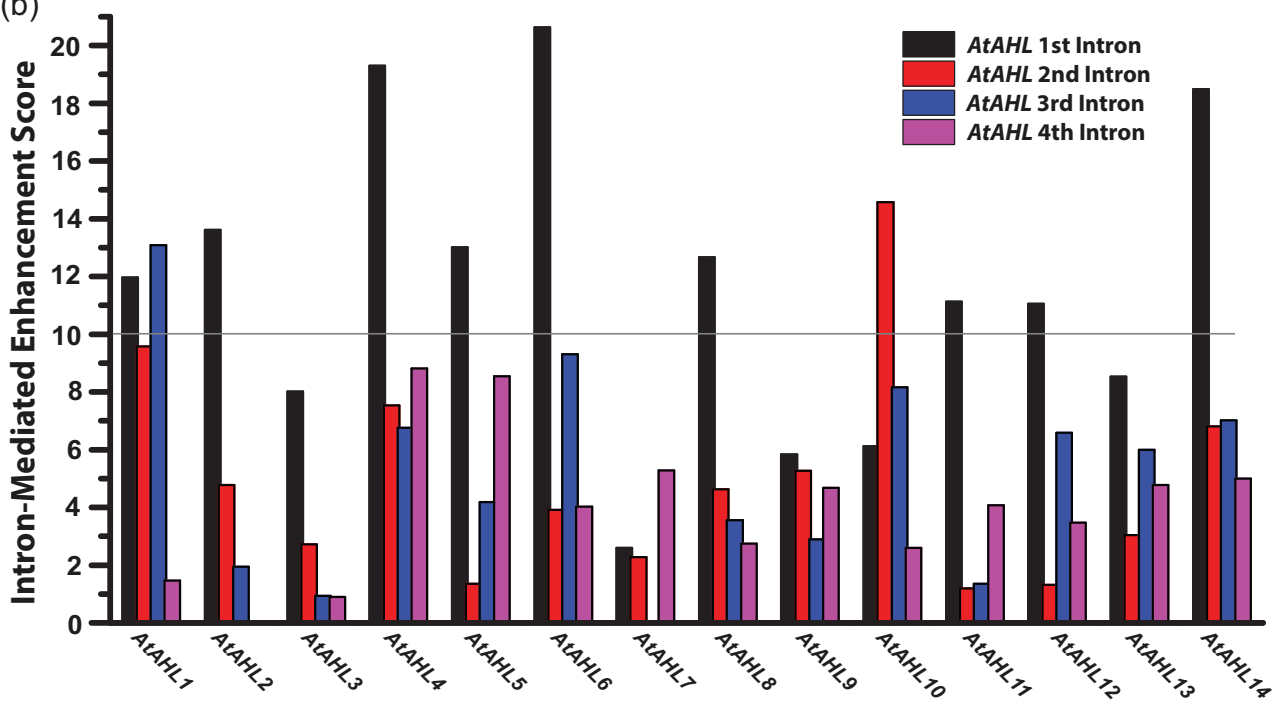

(c)

|                | Intron-Mediated Enhancement Score |            |            |            |
|----------------|-----------------------------------|------------|------------|------------|
|                | 1st Intron                        | 2nd Intron | 3rd Intron | 4th Intron |
| <i>AtAHL1</i>  | 11.97                             | 9.58       | 13.08      | 1.47       |
| <i>AtAHL2</i>  | 13.61                             | 4.78       | 1.94       | NA         |
| <i>AtAHL3</i>  | 8.01                              | 2.72       | 0.93       | 0.9        |
| <i>AtAHL4</i>  | 19.3                              | 7.53       | 6.76       | 8.81       |
| <i>AtAHL5</i>  | 13.01                             | 1.35       | 4.19       | 8.54       |
| <i>AtAHL6</i>  | 20.63                             | 3.91       | 9.3        | 4.03       |
| <i>AtAHL7</i>  | 2.6                               | 2.28       | 0          | 5.28       |
| <i>AtAHL8</i>  | 12.67                             | 4.63       | 3.56       | 2.74       |
| <i>AtAHL9</i>  | 5.84                              | 5.27       | 2.89       | 4.68       |
| <i>AtAHL10</i> | 6.12                              | 14.58      | 8.16       | 2.6        |
| <i>AtAHL11</i> | 11.13                             | 1.19       | 1.36       | 4.07       |
| <i>AtAHL12</i> | 11.06                             | 1.32       | 6.59       | 3.47       |
| <i>AtAHL13</i> | 8.53                              | 3.04       | 5.99       | 4.78       |
| <i>AtAHL14</i> | 18.49                             | 6.81       | 7.02       | 5          |
